# Supplementary material for: Substitution driven structural and magnetic transformation in Ca-doped BiFeO3 nanoparticles
Source: Royal Society of Chemistry journal article supplement (doi:10.1039/c6ra02316a), 2016-01-01
Supplement: c6ra02316a1.pdf [file c6ra02316a1.pdf]

## Supplementary Information

### Substitution driven Structural and Magnetic Transformation in Ca-doped BiFeO<sub>3</sub>

#### nanoparticles

Sunil Chauhan,<sup>a</sup> Manoj Kumar,<sup>a\*</sup> Sandeep Chhoker,<sup>a</sup> S. C. Katyal,<sup>a</sup> and M. Singh,<sup>b</sup>

<sup>a</sup>*Department of Physics and Materials Science & Engineering, Jaypee Institute of Information Technology, A-10, Sector-62, Noida-201307, India.* \* [mkumar.phy@gmail.com](mailto:mkumar.phy@gmail.com)

<sup>b</sup>*Department of Physics, Himachal Pradesh University, Shimla-5, India.*

TABLE S1: Rietveld refined parameters of  $\text{Bi}_{1-x}\text{Ca}_x\text{FeO}_3$  nanostructured samples.

| Samples              | Lattice parameters            | Atoms | Positions | x       | y      | z       | R-factors (%)              |
|----------------------|-------------------------------|-------|-----------|---------|--------|---------|----------------------------|
| <b>x=0</b>           | a = 5.5751 (Å)                | Fe    | 6a        | 0.0     | 0.0    | 0.0190  | $R_{\text{wp}} = 3.17$     |
| <b>R3c</b>           | c = 13.8590(Å)                | Bi    | 6a        | 0.0     | 0.0    | 0.29745 | $R_{\text{p}} = 2.49$      |
|                      | V = 373.061 (Å <sup>3</sup> ) | O     | 18b       | 0.2307  | 0.3581 | 0.0833  | $R_{\text{f}} = 1.75$      |
|                      |                               |       |           |         |        |         | $R_{\text{Bragg}} = 1.17$  |
| <b>x=0.05</b>        | a = 5.5704 (Å)                | Fe    | 6a        | 0.0     | 0.0    | -0.1785 | $R_{\text{wp}} = 3.36$     |
| <b>R3c (95.48%)</b>  | c = 13.8243 (Å)               | Bi/Ca | 6a        | 0.0     | 0.0    | 0.2041  | $R_{\text{p}} = 2.67$      |
|                      | V = 371.485 (Å <sup>3</sup> ) | O     | 18b       | 0.1023  | 0.2921 | 0.0833  | $R_{\text{f}} = 1.45$      |
|                      |                               |       |           |         |        |         |                            |
| <b>Pnma (4.52%)</b>  | a = 5.859(Å)                  | Bi/Ca | 4c        | 0.0294  | 0.25   | 0.9686  | $R_{\text{Bragg1}} = 1.75$ |
|                      | b = 7.8276(Å)                 | Fe    | 4b        | 0       | 0      | 0.5     | $R_{\text{f2}} = 4.61$     |
|                      | c = 5.5830 (Å)                | O     | 4c        | 0.4834  | 0.25   | 0.0725  | $R_{\text{Bragg2}} = 3.81$ |
|                      | V = 244.118 (Å <sup>3</sup> ) | O     | 8d        | 0.0539  | 0.5035 | 0.1902  |                            |
| <b>x=0.10</b>        | a = 5.5748 (Å)                | Fe    | 6a        | 0.0     | 0.0    | -0.1903 | $R_{\text{wp}} = 3.5$      |
| <b>R3c (74.89%)</b>  | c = 13.8169 (Å)               | Bi/Ca | 6a        | 0.0     | 0.0    | 0.2052  | $R_{\text{p}} = 2.78$      |
|                      | V = 371.889 (Å <sup>3</sup> ) | O     | 18b       | 0.0916  | 0.3112 | 0.0833  | $R_{\text{f}} = 1.11$      |
|                      |                               |       |           |         |        |         |                            |
| <b>Pnma (25.11%)</b> | a = 5.5763 (Å)                | Bi/Ca | 4c        | -0.014  | 0.25   | 0.9858  | $R_{\text{Bragg1}} = 1.35$ |
|                      | b = 7.8303 (Å)                | Fe    | 4b        | 0       | 0      | 0.5     | $R_{\text{f2}} = 2.48$     |
|                      | c = 5.5748 (Å)                | O     | 4c        | 0.5011  | 0.25   | -0.0143 | $R_{\text{Bragg2}} = 2.59$ |
|                      | V = 243.418 (Å <sup>3</sup> ) | O     | 8d        | 0.1792  | 0.4889 | 0.2202  |                            |
| <b>x=0.15</b>        | a = 5.5621 (Å)                | Fe    | 6a        | 0.0     | 0.0    | -0.0188 | $R_{\text{wp}} = 3.45$     |
| <b>R3c (57.02%)</b>  | c = 13.8167 (Å)               | Bi/Ca | 6a        | 0.0     | 0.0    | 0.2027  | $R_{\text{p}} = 2.72$      |
|                      | V = 371.902 (Å <sup>3</sup> ) | O     | 18b       | 0.1028  | 0.2997 | 0.0833  | $R_{\text{f}} = 1.81$      |
|                      |                               |       |           |         |        |         |                            |
| <b>Pnma (42.98%)</b> | a = 5.5621 (Å)                | Bi/Ca | 4c        | 0.01246 | 0.25   | 0.9825  | $R_{\text{Bragg1}} = 1.92$ |
|                      | b = 7.827 (Å)                 | Fe    | 4b        | 0       | 0      | 0.5     | $R_{\text{f2}} = 3.44$     |
|                      | c = 5.5744 (Å)                | O     | 4c        | 0.4897  | 0.25   | 0.0044  | $R_{\text{Bragg2}} = 2.72$ |
|                      | V = 242.68(Å <sup>3</sup> )   | O     | 8d        | 0.28137 | 0.479  | 0.2012  |                            |
| <b>x=0.20</b>        | a = 5.5625 (Å)                | Fe    | 6a        | 0.0     | 0.0    | -0.0131 | $R_{\text{wp}} = 3.38$     |
| <b>R3c (15.80%)</b>  | c = 13.7995 (Å)               | Bi/Ca | 6a        | 0.0     | 0.0    | 0.2193  | $R_{\text{p}} = 2.68$      |
|                      | V = 369.771 (Å <sup>3</sup> ) | O     | 18b       | 0.1028  | 0.2781 | 0.0833  | $R_{\text{f}} = 3.89$      |
|                      |                               |       |           |         |        |         |                            |
| <b>Pnma (84.20%)</b> | a = 5.5506 (Å)                | Bi/Ca | 4c        | 0.01464 | 0.25   | 0.9848  | $R_{\text{Bragg1}} = 4.1$  |
|                      | b = 7.8316 (Å)                | Fe    | 4b        | 0       | 0      | 0.5     | $R_{\text{f2}} = 4.77$     |
|                      | c = 5.5541 (Å)                | O     | 4c        | 0.5049  | 0.25   | 0.0108  | $R_{\text{Bragg2}} = 4.10$ |
|                      | V = 241.438(Å <sup>3</sup> )  | O     | 8d        | 0.1664  | 0.4575 | 0.1943  |                            |

TABLE S2: Raman modes positions and FWHMs of  $\text{Bi}_{1-x}\text{Ca}_x\text{FeO}_3$  nanoparticles.

| S. No. | Mode     | x = 0.0                    |                                          |      | x = 0.05                   |                                          |      | x = 0.10                   |                                          |      | x = 0.15                   |                                          |      | x = 0.20                   |                                          |      |
|--------|----------|----------------------------|------------------------------------------|------|----------------------------|------------------------------------------|------|----------------------------|------------------------------------------|------|----------------------------|------------------------------------------|------|----------------------------|------------------------------------------|------|
|        |          | Center<br>$\text{cm}^{-1}$ | $\omega_i$<br>$\Gamma_i \text{ cm}^{-1}$ | FWHM |
| 1      | E(TO1)   | 71.1                       | 8.9                                      |      | 66.3                       | 10.6                                     |      | 64.3                       | 14.9                                     |      | 63.4                       | 15.1                                     |      | 63.9                       | 24.5                                     |      |
| 2      | E(LO1)   | 76.6                       | 5.3                                      |      | 75.7                       | 10.5                                     |      | 75.3                       | 13.3                                     |      | 75.0                       | 16.4                                     |      | 75.0                       | 32.6                                     |      |
| 3      | E(TO2)   | 139.2                      | 27.7                                     |      | 143.1                      | 41.4                                     |      | 142.7                      | 43.4                                     |      | 144.7                      | 52.1                                     |      | 145.9                      | 51.8                                     |      |
| 4      | A1(TO1)  | 172.3                      | 10.9                                     |      | 173.1                      | 15.8                                     |      | 172.7                      | 17.7                                     |      | 172.5                      | 19.5                                     |      | 173.4                      | 31.9                                     |      |
| 5      | A1(TO2)  | 218.4                      | 17.9                                     |      | 219.7                      | 15.7                                     |      | 221.0                      | 22.0                                     |      | 223.8                      | 23.2                                     |      | 223.8                      | 30.9                                     |      |
| 6      | E(TO3)   | 232.2                      | 23.5                                     |      | 230.7                      | 19.2                                     |      | 236.4                      | 28.9                                     |      | 239.5                      | 21.1                                     |      | 239.1                      | 23.1                                     |      |
| 7      | E(TO4)   | 261.2                      | 19.3                                     |      | 257.6                      | 32.7                                     |      | 262.4                      | 30.6                                     |      | 258.3                      | 28.6                                     |      | 256.6                      | 17.1                                     |      |
| 8      | E(TO5)   | 278.1                      | 23.8                                     |      | 278.2                      | 27.3                                     |      | 280.4                      | 29.3                                     |      | 276.9                      | 29.2                                     |      | 276.7                      | 37.9                                     |      |
| 9      | A1(TO3)  | 302.4                      | 37.3                                     |      | 299.8                      | 41.6                                     |      | 300.0                      | 27.9                                     |      | 296.4                      | 27.4                                     |      | 306.9                      | 27.7                                     |      |
| 10     | E(TO6)   | 346.6                      | 27.5                                     |      | 353.1                      | 18.1                                     |      | 341.1                      | 34.4                                     |      | 351.3                      | 35.1                                     |      | -                          | -                                        |      |
| 11     | E(TO7)   | 369.7                      | 10.9                                     |      | 371.1                      | 7.0                                      |      | 370.7                      | 13.6                                     |      | 372.5                      | 21.7                                     |      | -                          | -                                        |      |
| 12     | E(TO8)   | 436.3                      | 11.4                                     |      | 441.6                      | 10.9                                     |      | 454.4                      | 29.8                                     |      | 451.1                      | 36.6                                     |      | 465.5                      | 25.7                                     |      |
| 13     | E(LO8)   | 471.2                      | 32.6                                     |      | 476.8                      | 32.0                                     |      | 479.4                      | 33.7                                     |      | 479.9                      | 34.9                                     |      | 486.5                      | 28.8                                     |      |
| 14     | E(TO9)   | 524.0                      | 29.6                                     |      | 521.4                      | 42.6                                     |      | 517.7                      | 43.7                                     |      | 515.6                      | 43.0                                     |      | 512.7                      | 35.1                                     |      |
| 15     | A1(TO4)  | 550.8                      | 30.6                                     |      | 547.9                      | 28.6                                     |      | 540.8                      | 39.6                                     |      | 545.4                      | 46.8                                     |      | 538.2                      | 38.3                                     |      |
| 16     | E(LO9)   | 608.2                      | 42.9                                     |      | 614.9                      | 48.6                                     |      | 618.6                      | 56.5                                     |      | 621.5                      | 62.0                                     |      | 631.0                      | 70.8                                     |      |
| 17     | -        | -                          | -                                        |      | 660.9                      | 78.1                                     |      | 665.5                      | 79.8                                     |      | 671.8                      | 67.0                                     |      | 684.1                      | 63.3                                     |      |
| 18     | 2E(LO8)  | 938.4                      | 72.9                                     |      | 937.8                      | 87.5                                     |      | 943.1                      | 85.7                                     |      | 957.9                      | 145.95                                   |      | 940.9                      | 143.3                                    |      |
| 19     | 2E(TO9)  | 1038.8                     | 102.7                                    |      | 1034.6                     | 105.7                                    |      | 1036.2                     | 85.8                                     |      | 1035.8                     | 85.2                                     |      | 1030.4                     | 86.2                                     |      |
| 20     | 2A1(TO4) | 1101.2                     | 58.7                                     |      | 1099.6                     | 63.3                                     |      | 1097.0                     | 57.1                                     |      | 1096.2                     | 66.2                                     |      | 1085.7                     | 67.6                                     |      |
| 21     | 2A1(LO4) | 1147.6                     | 47.3                                     |      | 1144.4                     | 57.6                                     |      | 1144.6                     | 57.9                                     |      | 1143.5                     | 62.9                                     |      | 1135.8                     | 67.4                                     |      |
| 22     | 2E(LO9)  | 1264.3                     | 142.4                                    |      | 1273.6                     | 151.7                                    |      | 1275.9                     | 159.2                                    |      | 1276.4                     | 164.8                                    |      | 1281.6                     | 200.3                                    |      |
